# Supplementary material for: Sex-Related Disparities in the Incidence and Outcomes of Ischemic Stroke among Type 2 Diabetes Patients. A Matched-Pair Analysis Using the Spanish National Hospital Discharge Database for Years 2016–2018
Source: Int J Environ Res Public Health. 2021 Apr 1;18(7):3659. doi: 10.3390/ijerph18073659 (PMC8037293; doi:10.3390/ijerph18073659)
Supplement: Supplementary file 1 [file ijerph-18-03659-s001.pdf]

**Table S1.** International Classification of Disease 10<sup>th</sup> edition (ICD-10) codes for the clinical diagnosis and procedures used in this investigation.

| Clinical diagnosis and procedures                               | ICD-10 codes                                                                              |
|-----------------------------------------------------------------|-------------------------------------------------------------------------------------------|
| IS by thrombosis of precerebral arteries                        | I63.0; I63.00; I63.01; I63.01X; I63.02; I63.03; I63.03X; I63.09                           |
| IS by embolism of precerebral arteries                          | I63.1; I63.10; I63.11; I63.11X; I63.12; I63.13; I63.13X; I63.19                           |
| IS by unspecified occlusion or stenosis of precerebral arteries | I63.2; I63.20; I63.21; I63.21X; I63.22; I63.23; I63.23X; I63.29                           |
| IS by thrombosis of cerebral arteries                           | I63.3; I63.30; I63.31; I63.31X; I63.32; I63.32X; I63.33; I63.33X; I63.34; I63.34X; I63.39 |
| IS by embolism of cerebral arteries                             | I63.4; I63.40; I63.41; I63.41X; I63.42; I63.42X; I63.43; I63.43X; I63.44; I63.44X; I63.49 |
| IS by unspecified occlusion or stenosis of cerebral arteries    | I63.5; I63.50; I63.51; I63.51X; I63.52; I63.52X; I63.53; I63.53X; I63.54; I63.54X; I63.59 |
| IS by cerebral venous thrombosis, non pyogenic                  | I63.6                                                                                     |
| Other cerebral infarction                                       | I63.8; I63.81; I63.89                                                                     |
| Cerebral infarction, unspecified                                | I63.9                                                                                     |
| Obesity                                                         | E66.X                                                                                     |
| Hypertension                                                    | I10, I16.6                                                                                |
| Lipid metabolism disorders                                      | E78.0X-E78.5                                                                              |
| Atrial fibrillation                                             | I48.0, I48.1, I48.2, I48.91                                                               |
| Anemia                                                          | D50.0, D50.8, D50.9, D51.x-D53.x                                                          |
| Alcohol abuse                                                   | F10, E52, G62.1, I42.6, K29.2, K70.0, K70.3, K70.9, T51.x, Z50.2, Z71.4, Z72.1            |
| Depression                                                      | F20.4, F31.3-F31.5, F32.x, F33.x, F34.1, F41.2, F43.2                                     |
| Mechanical ventilation                                          | 5A1945Z, 5A1955Z, 5A1935Z, 5A09357, 5A09457, 5A09557                                      |
| Endovascular thrombectomy                                       | 03CG3ZZ, 03CH3ZZ, 03CJ3ZZ, 03CK3ZZ, 03CL3ZZ, 03CM3ZZ, 03CN3ZZ, 03CP3ZZ, 03CQ3ZZ           |
| Thrombolytic therapy                                            | 3E03317, 3E04317, 3E05317, 3E06317; Z9282                                                 |

IS: ischemic stroke.

**Table S2.** Logistic regression factors associated with IHM after myocardial infarction among all patients and according to the presence of T2DM to assess the sex differences.

|                             | Male               | Female             |
|-----------------------------|--------------------|--------------------|
| 35–49 years                 | 1                  | 1                  |
| 50–64 years                 | 1.8(1.22–2.65)     | 1.22(0.69–2.18)    |
| 65–79 years                 | 3.15(2.16–4.61)    | 2.15(1.23–3.74)    |
| ≥80 years                   | 7.45(5.1–10.89)    | 5.89(3.38–10.26)   |
| Obesity                     | 0.81(0.7–0.94)     | 0.84(0.75–0.95)    |
| Renal disease               | 1.21(1.1–1.33)     | 1.23(1.12–1.34)    |
| Atrial fibrillation         | 1.37(1.28–1.47)    | 1.54(1.45–1.64)    |
| Congestive heart failure    | 1.95(1.76–2.15)    | 1.76(1.61–1.93)    |
| Acute myocardial infarction | 1.39(1.24–1.57)    | 1.4(1.21–1.63)     |
| Dementia                    | 1.88(1.66–2.14)    | 1.65(1.51–1.8)     |
| Mechanical ventilation      | 15.58(13.76–17.65) | 13.47(11.48–15.79) |
| Thrombolytic therapy        | 0.77(0.67–0.88)    | 0.62(0.53–0.71)    |
| T2DM                        | 1.03(0.97–1.1)     | 1.06(0.99–1.13)    |

T2DM: Type 2 diabetes mellitus.
